# Supplementary material for: Impact of Visceral Fat on Survival and Metastasis of Stage III Colorectal Cancer
Source: PubMed Central journal article supplement — Gut Liver. 2021 Jul 28;16(1):53–61. doi: 10.5009/gnl20266 (PMC8761926; doi:10.5009/gnl20266), 2021-07-28
Supplement: gnl-16-1-53-supple.pdf [file gnl-16-1-53-supple.pdf]

**Supplementary Table 1.** Cox Hazard Regression Analysis for Overall Mortality According to VT Ratio of Each Intervertebral Level

| Ratio                 | Univariate HR (95% CI) | p-value | Adjusted HR (95% CI)* | p-value |
|-----------------------|------------------------|---------|-----------------------|---------|
| VT ratio of L3–L4 (%) | 1.014 (0.999–1.028)    | 0.066   | 1.014 (0.994–1.034)   | 0.170   |
| VT ratio of L4–L5 (%) | 1.016 (0.998–1.035)    | 0.075   | 1.014 (0.992–1.036)   | 0.221   |
| VT ratio of L5–S1 (%) | 1.018 (1.000–1.036)    | 0.050   | 1.016 (0.994–1.038)   | 0.153   |

HR, hazard ratio; CI, confidence interval; VT, visceral adipose tissue to total adipose tissue.

\*Adjusted for age at diagnosis, sex, familial history of colorectal cancer.

**Supplementary Table 2.** Cox Hazard Regression Analysis for Recurrence According to VT Ratio of Each Intervertebral Level

| Ratio                 | Univariate HR (95% CI) | p-value | Adjusted HR (95% CI)* | p-value |
|-----------------------|------------------------|---------|-----------------------|---------|
| VT ratio of L3–L4 (%) | 1.000 (0.986–1.015)    | 0.971   | 0.993 (0.974–1.013)   | 0.475   |
| VT ratio of L4–L5 (%) | 1.001 (0.983–1.020)    | 0.904   | 0.995 (0.973–1.018)   | 0.693   |
| VT ratio of L5–S1 (%) | 1.005 (0.987–1.023)    | 0.578   | 1.002 (0.979–1.024)   | 0.886   |

HR, hazard ratio; CI, confidence interval; VT, visceral adipose tissue to total adipose tissue.

\*Adjusted for age at diagnosis, sex, familial history of colorectal cancer.

**Supplementary Table 3.** Cox Hazard Regression Analysis for Colorectal Cancer-Specific Mortality According to VT ratio of Each Intervertebral Level

| Ratio                 | Univariate HR (95% CI) | p-value | Adjusted HR (95% CI)* | p-value |
|-----------------------|------------------------|---------|-----------------------|---------|
| VT ratio of L3–L4 (%) | 1.020 (1.001–1.039)    | 0.038   | 1.027 (1.001–1.053)   | 0.038   |
| VT ratio of L4–L5 (%) | 1.029 (1.006–1.053)    | 0.014   | 1.033 (1.005–1.061)   | 0.020   |
| VT ratio of L5–S1 (%) | 1.027 (1.004–1.050)    | 0.021   | 1.029 (1.002–1.058)   | 0.035   |

HR, hazard ratio; CI, confidence interval; VT, visceral adipose tissue to total adipose tissue.

\*Adjusted for age at diagnosis, sex, familial history of colorectal cancer.

**Supplementary Table 4.** Cox Hazard Regression Analysis for Liver Recurrence According to Obesity Index

| Obesity index                  | Univariate HR (95% CI) | p-value | Adjusted HR (95% CI)* | p-value |
|--------------------------------|------------------------|---------|-----------------------|---------|
| BMI (kg/m <sup>2</sup> )       | 1.083 (0.975–1.203)    | 0.136   | 1.082 (0.973–1.204)   | 0.147   |
| Average VAT (cm <sup>2</sup> ) | 1.004 (0.994–1.015)    | 0.411   | 1.005 (0.993–1.016)   | 0.442   |
| Average SAT (cm <sup>2</sup> ) | 1.002 (0.997–1.008)    | 0.428   | 1.004 (0.997–1.010)   | 0.276   |
| VAT to TAT ratio (%)           | 1.011 (0.978–1.045)    | 0.519   | 0.990 (0.957–1.025)   | 0.570   |
| VAT to SAT ratio (%)           | 1.004 (0.991–1.018)    | 0.523   | 1.005 (0.987–1.022)   | 0.603   |

HR, hazard ratio; CI, confidence interval; BMI, body mass index; VAT, visceral adipose tissue; SAT, subcutaneous adipose tissue; TAT, total adipose tissue.

\*Adjusted for age at diagnosis, sex, familial history of colorectal cancer.

**Supplementary Table 5.** Cox Hazard Regression Analysis for Lung Recurrence According to Obesity Index

| Obesity index                  | Univariate HR (95% CI) | p-value | Adjusted HR (95% CI)* | p-value |
|--------------------------------|------------------------|---------|-----------------------|---------|
| BMI (kg/m <sup>2</sup> )       | 1.093 (0.971–1.229)    | 0.140   | 1.083 (0.961–1.222)   | 0.192   |
| Average VAT (cm <sup>2</sup> ) | 1.007 (0.995–1.018)    | 0.267   | 1.006 (0.993–1.020)   | 0.345   |
| Average SAT (cm <sup>2</sup> ) | 0.999 (0.992–1.006)    | 0.786   | 1.000 (0.992–1.007)   | 0.973   |
| VAT to TAT ratio (%)           | 1.033 (0.995–1.073)    | 0.093   | 1.045 (0.993–1.099)   | 0.091   |
| VAT to SAT ratio (%)           | 1.012 (0.998–1.027)    | 0.099   | 1.015 (0.996–1.033)   | 0.118   |

HR, hazard ratio; CI, confidence interval; BMI, body mass index; VAT, visceral adipose tissue; SAT, subcutaneous adipose tissue; TAT, total adipose tissue.

\*Adjusted for age at diagnosis, sex, familial history of colorectal cancer.

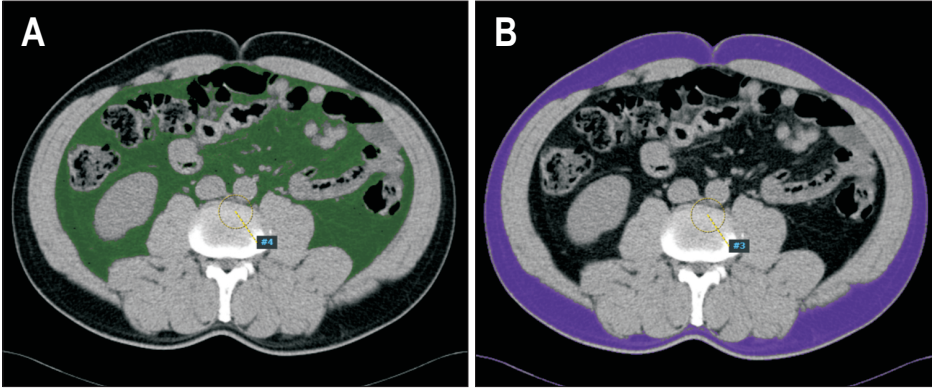

**Supplementary Fig. 1.** Area for measurement of visceral adipose tissue (A) and subcutaneous adipose tissue (B).

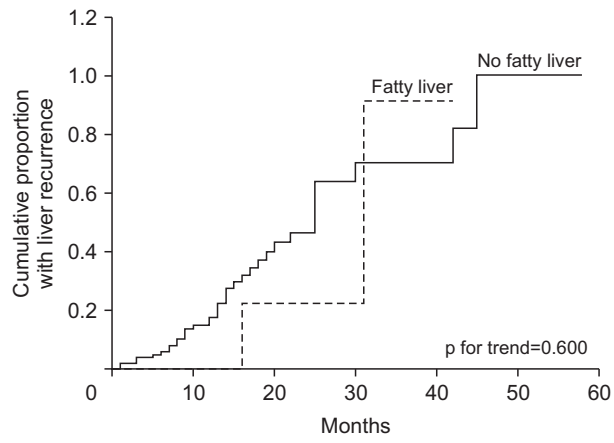

**Supplementary Fig. 2.** Kaplan-Meier curve for liver recurrence rate according to the presence of fatty liver in stage III colorectal cancer patients.
